# Supplementary material for: Describing Unmet Supportive Care Needs among Young Adults with Cancer (25–39 Years) and the Relationship with Health-Related Quality of Life, Psychological Distress, and Illness Cognitions
Source: MDPI journal article supplement (doi:10.3390/jcm10194449), 2021-09-28
Supplement: s1 [file s1]

**Supplementary Material Table S1.** Service needs questionnaire.

| Please indicate whether you need(ed) any of the following services during or after your treatment for cancer and whether you used them. |                                                                     |                            |                          |                          |                          |
|-----------------------------------------------------------------------------------------------------------------------------------------|---------------------------------------------------------------------|----------------------------|--------------------------|--------------------------|--------------------------|
|                                                                                                                                         |                                                                     | Did you need this service? |                          | Did you use the service? |                          |
|                                                                                                                                         |                                                                     | Yes                        | No                       | Yes                      | No                       |
| a.                                                                                                                                      | Physiotherapist                                                     | <input type="checkbox"/>   | <input type="checkbox"/> | <input type="checkbox"/> | <input type="checkbox"/> |
| b.                                                                                                                                      | Pain management expert                                              | <input type="checkbox"/>   | <input type="checkbox"/> | <input type="checkbox"/> | <input type="checkbox"/> |
| c.                                                                                                                                      | Psychologist, mental health worker (e.g. managing anxiety or worry) | <input type="checkbox"/>   | <input type="checkbox"/> | <input type="checkbox"/> | <input type="checkbox"/> |
| d.                                                                                                                                      | Spiritual or religious counselor                                    | <input type="checkbox"/>   | <input type="checkbox"/> | <input type="checkbox"/> | <input type="checkbox"/> |
| e.                                                                                                                                      | Social worker/occupational therapist                                | <input type="checkbox"/>   | <input type="checkbox"/> | <input type="checkbox"/> | <input type="checkbox"/> |
| f.                                                                                                                                      | Financial expert<br>(e.g. advice to help figure out payments)       | <input type="checkbox"/>   | <input type="checkbox"/> | <input type="checkbox"/> | <input type="checkbox"/> |
| g.                                                                                                                                      | Psychosexual therapist (e.g. advice about sexual issues)            | <input type="checkbox"/>   | <input type="checkbox"/> | <input type="checkbox"/> | <input type="checkbox"/> |
| h.                                                                                                                                      | Peer support group (online or in person)                            | <input type="checkbox"/>   | <input type="checkbox"/> | <input type="checkbox"/> | <input type="checkbox"/> |
| i.                                                                                                                                      | Second opinion about treatment                                      | <input type="checkbox"/>   | <input type="checkbox"/> | <input type="checkbox"/> | <input type="checkbox"/> |
| j.                                                                                                                                      | Dietician                                                           | <input type="checkbox"/>   | <input type="checkbox"/> | <input type="checkbox"/> | <input type="checkbox"/> |
| k.                                                                                                                                      | Fertility counseling                                                | <input type="checkbox"/>   | <input type="checkbox"/> | <input type="checkbox"/> | <input type="checkbox"/> |
| m.                                                                                                                                      | Help with childcare                                                 | <input type="checkbox"/>   | <input type="checkbox"/> | <input type="checkbox"/> | <input type="checkbox"/> |
| n.                                                                                                                                      | Help with care for parents                                          | <input type="checkbox"/>   | <input type="checkbox"/> | <input type="checkbox"/> | <input type="checkbox"/> |
| o.                                                                                                                                      | Psychological support for partner/spouse                            | <input type="checkbox"/>   | <input type="checkbox"/> | <input type="checkbox"/> | <input type="checkbox"/> |
| p.                                                                                                                                      | Palliative care counseling or support                               | <input type="checkbox"/>   | <input type="checkbox"/> | <input type="checkbox"/> | <input type="checkbox"/> |
| q.                                                                                                                                      | Complementary and alternative medicine                              | <input type="checkbox"/>   | <input type="checkbox"/> | <input type="checkbox"/> | <input type="checkbox"/> |
